# Supplementary material for: Implicit Associations between Adverbs of Place and Actions in the Physical and Digital Space
Source: MDPI journal article supplement (doi:10.3390/brainsci11111523), 2021-11-17
Supplement: s1 [file s1]

Article

# Implicit Associations between Adverbs of Place and Actions in the Physical and Digital Space

Laila Craighero <sup>1,\*</sup> and Maddalena Marini <sup>2</sup>

<sup>1</sup> Department of Neuroscience and Rehabilitation, University of Ferrara, 44121 Ferrara, Italy

<sup>2</sup> Center for Translational Neurophysiology, Istituto Italiano di Tecnologia, 44121 Ferrara, Italy; Maddalena.Marini@iit.it

\* Correspondence: crh@unife.it; Tel.: +39-0532-455928

| Categories | Stimuli |
|------------|---------|
| grasp      |         |
| look at    |         |
| near       |         |
| far        |         |

**Figure S1.** Double entry table presented in Experiment 1, showing images and associated categories.

**Citation:** Craighero, L.; Marini, M. Implicit Associations between Adverbs of Place and Actions in the Physical and Digital Space. *Brain Sci.* **2021**, *11*, 1523. <https://doi.org/10.3390/brainsci11111523>

Academic Editor: Peter König

Received: 21 September 2021

Accepted: 13 November 2021

Published: 17 November 2021

**Publisher's Note:** MDPI stays neutral with regard to jurisdictional claims in published maps and institutional affiliations.

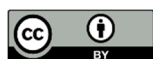

**Copyright:** © 2021 by the authors. Submitted for possible open access publication under the terms and conditions of the Creative Commons Attribution (CC BY) license (<https://creativecommons.org/licenses/by/4.0/>).

| Categories | Stimuli |
|------------|---------|
| social     |         |
| no-social  |         |
| near       |         |
| far        |         |

**Figure S2.** Double entry table presented in Experiment 2, showing images and associated categories.

| Categories      | Stimuli                                                                           |                                                                                   |                                                                                    |                                                                                     |                                                                                     |
|-----------------|-----------------------------------------------------------------------------------|-----------------------------------------------------------------------------------|------------------------------------------------------------------------------------|-------------------------------------------------------------------------------------|-------------------------------------------------------------------------------------|
| <i>whatsapp</i> |  |  |  |  |  |
| <i>weather</i>  |  |  |  |  |  |
| <i>near</i>     |  |  |  |  |  |
| <i>far</i>      |  |  |  |  |  |

**Figure S3.** Double entry table presented in Experiment 3, showing images and associated categories.

| Categories      | Stimuli                                                                             |                                                                                     |                                                                                      |                                                                                       |                                                                                       |
|-----------------|-------------------------------------------------------------------------------------|-------------------------------------------------------------------------------------|--------------------------------------------------------------------------------------|---------------------------------------------------------------------------------------|---------------------------------------------------------------------------------------|
| <i>whatsapp</i> |    |    |    |    |    |
| <i>google</i>   |   |   |   |   |   |
| <i>near</i>     |  |  |  |  |  |
| <i>far</i>      |  |  |  |  |  |

**Figure S4.** Double entry table presented in Experiment 4, showing images and associated categories.
